# Supplementary material
Source: publisher figshare collection journal article supplement (https://acs.figshare.com/ndownloader/files/35205607)
Supplement: Supplementary file 1 [file 35205607]

## Sheet: Sheet1
Table S2. Most common ligands found proximal to cross-links on XLinkDB in structures, indicating their frequency among all structures and among cross-links with proximal ligands
ligand_id	ligand_name	num_crosslinks	fraction_crosslinks	fraction_pdbs
MG	MAGNESIUM ION	135184	0.2299	0.1284
SO4	SULFATE ION	79662	0.1355	0.1535
MSE	SELENOMETHIONINE	78545	0.1336
GOL	GLYCEROL	43966	0.0748	0.1382
EDO	1,2-ETHANEDIOL	40548	0.0689	0.0871
ADP	ADENOSINE-5'-DIPHOSPHATE	37766	0.0642	0.0192
CL	CHLORIDE ION	34740	0.0591	0.1059
CA	CALCIUM ION	30030	0.0511	0.0881
NAD	NICOTINAMIDE-ADENINE-DINUCLEOTIDE	26979	0.0459	0.011
PO4	PHOSPHATE ION	22674	0.0386	0.0454
ATP	ADENOSINE-5'-TRIPHOSPHATE	22330	0.038	0.0124
OHX	osmium (III) hexammine	19567	0.0333	0.0003
GTP	GUANOSINE-5'-TRIPHOSPHATE	18578	0.0316	0.0084
ZN	ZINC ION	16288	0.0277	0.1277
GDP	GUANOSINE-5'-DIPHOSPHATE	15092	0.0257	0.0109
FAD	FLAVIN-ADENINE DINUCLEOTIDE	14211	0.0242	0.0167
MN	MANGANESE (II) ION	13121	0.0223	0.0271
HEM	PROTOPORPHYRIN IX CONTAINING FE	12039	0.0205	0.0345
HEC	HEME C	11996	0.0204	0.006
UNX	UNKNOWN ATOM OR ION	11758	0.02	0.0051
K	POTASSIUM ION	11696	0.0199	0.0231
COA	COENZYME A	11160	0.019	0.0045
NA	SODIUM ION	10277	0.0175	0.0691
SEP	PHOSPHOSERINE	10052	0.0171	0.0108
ANP	PHOSPHOAMINOPHOSPHONIC ACID-ADENYLATE ESTER	9748	0.0166	0.0065
ACT	ACETATE ION	9195	0.0156	0.0422
NAP	NADP NICOTINAMIDE-ADENINE-DINUCLEOTIDE PHOSPHATE	8674	0.0147	0.0102
PEG	DI(HYDROXYETHYL)ETHER	8473	0.0144	0.028
NAI	1,4-DIHYDRONICOTINAMIDE ADENINE DINUCLEOTIDE	7653	0.013	0.0021
NDP	NADPH DIHYDRO-NICOTINAMIDE-ADENINE-DINUCLEOTIDE PHOSPHATE	6872	0.0117	0.0057
MES	2-(N-MORPHOLINO)-ETHANESULFONIC ACID	6674	0.0113	0.0121
NO3	NITRATE ION	6256	0.0106	0.0055
AGS	PHOSPHOTHIOPHOSPHORIC ACID-ADENYLATE ESTER	6222	0.0106	0.0018
API	2,6-DIAMINOPIMELIC ACID	5965	0.0101	0.0002
NAG	2-acetamido-2-deoxy-beta-D-glucopyranose	5705	0.0097	0.0659
MPD	(4S)-2-METHYL-2,4-PENTANEDIOL	5576	0.0095	0.0127
IOD	IODIDE ION	5318	0.009	0.0071
MYR	MYRISTIC ACID	5226	0.0089	0.0021
PG4	TETRAETHYLENE GLYCOL	4968	0.0084	0.0114
BEF	BERYLLIUM TRIFLUORIDE ION	4396	0.0075	0.0017
DAL	D-ALANINE	4244	0.0072	0.0023
DMS	DIMETHYL SULFOXIDE	3965	0.0067	0.0212
MLE	N-METHYLLEUCINE	3796	0.0065	0.0005
CIT	CITRIC ACID	3768	0.0064	0.0084
1PE	PENTAETHYLENE GLYCOL	3666	0.0062	0.0059
CSO	S-HYDROXYCYSTEINE	3538	0.006	0.0065
PSU	PSEUDOURIDINE-5'-MONOPHOSPHATE	3384	0.0058	0.0035
PLP	PYRIDOXAL-5'-PHOSPHATE	3172	0.0054	0.008
TPO	PHOSPHOTHREONINE	3169	0.0054	0.0081
PGE	TRIETHYLENE GLYCOL	3136	0.0053	0.0116
